# Supplementary material for: Comprehensive magnetic resonance characteristics of carbon-encapsulated iron nanoparticles: a new frontier for the core-shell–type contrast agents
Source: Springer Nature journal article supplement (doi:10.1007/s11051-020-04795-w), 2020-03-26
Supplement: MOESM1 [file 17835736]

**Comprehensive magnetic resonance characteristics**

**of carbon-encapsulated iron nanoparticles: a new frontier for the core-shell-type contrast agents**

**Supplementary materials**

**Ireneusz P. Grudzinski**1***,Michal Bystrzejewski**2**, Piotr Bogorodzki**3**,
Andrzej Cieszanowski**4**, Wojciech Szeszkowski**5**,** **Magdalena Poplawska**6**,**
**Magdalena Bamburowicz-Klimkowska**1

1 Faculty of Pharmacy, Medical University of Warsaw,

ul. S. Banacha 1, 02-097 Warsaw, Poland

2 Faculty of Chemistry, University of Warsaw,

ul. L. Pasteura 1, 02-093 Warsaw, Poland

3 Faculty of Electronics and Information Technology,

Warsaw University of Technology,

ul. Nowowiejska 15/19, 00-665 Warsaw, Poland

4 Maria Sklodowska – Curie Memorial Cancer Center

and Institute of Oncology, Roentgena 5, 02-781 Warsaw, Poland

5 Faculty of Medicine, Medical University of Warsaw,

S. Banacha 1a, 02-097 Warsaw, Poland

6 Faculty of Chemistry, Warsaw University of Technology,

ul. S. Noakowskiego 3, 00-644 Warsaw, Poland

*Corresponding author: Ireneusz P. Grudzinski

E-mail: [ireneusz.grudzinski@wum.edu.pl](mailto:ireneusz.grudzinski@wum.edu.pl)


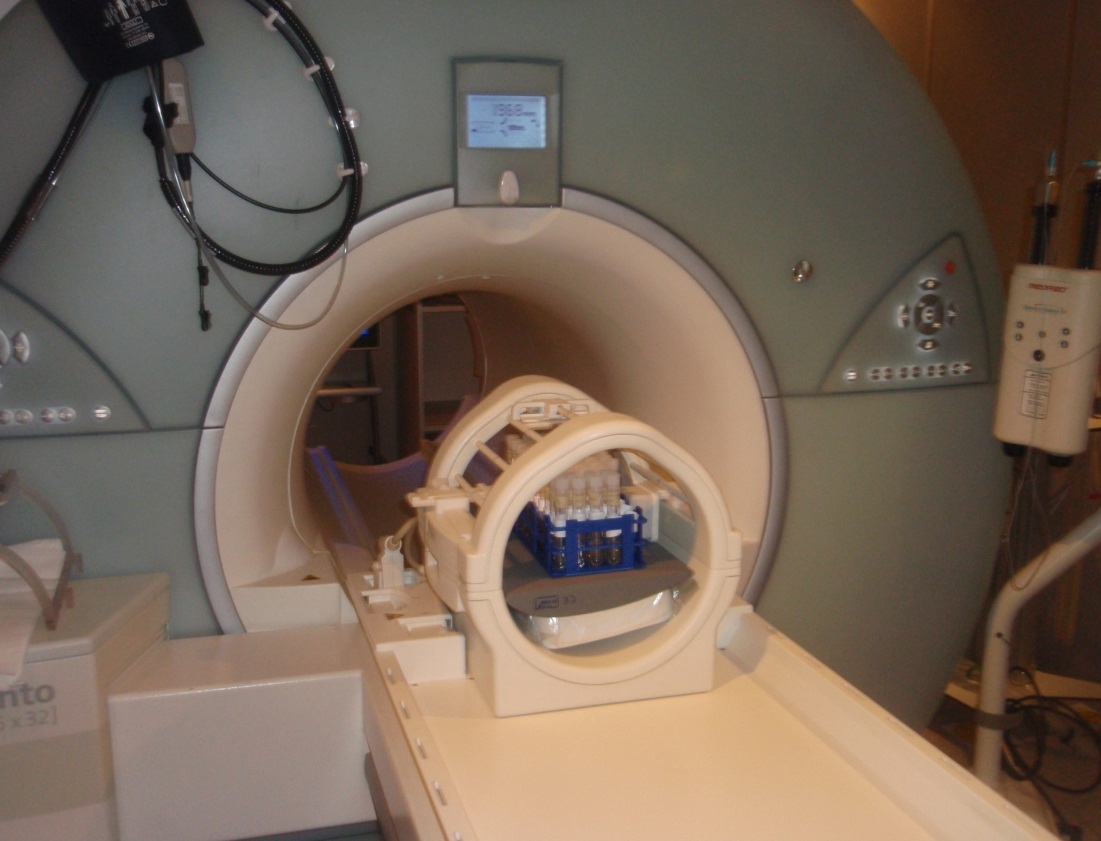


**Suppl. Fig. S1.** The experimental setup using a 1.5 T clinical scanner in MRI phantom studies.

**Suppl. Fig. S2A.** Effects of carbon-encapsulated iron nanoparticles on T1 times measured at the magnetic field of 1.5 Tesla. T1-weighted images were acquired using the inversion recovery SE sequence with different inversion times (TI 50, 100, 200, 400, 800, 1200, 1600, and 2400 ms). The remaining spatial resolution parameters were acquired as follows: TR (3500 ms), TE (14 ms), echo spacing (14.1 ms), voxel size (1.1 × 1.1 × 2.0 mm), field of view (140 mm), flip angle (150 deg), slice thickness (2.0 mm), and averages (3).

**Suppl. Fig. S2B.** Effects of carbon-encapsulated iron nanoparticles on R1 (1/T1) measured at the magnetic field of 1.5 Tesla. Please see Suppl. Fig. S2A for the acquisition parameters.

**Suppl. Fig. S3A.** Effects of carbon-encapsulated iron nanoparticles on T2 times measured at the magnetic field of 1.5 Tesla. T2-weighted images were acquired using the SE sequence with TR (3570 ms) and variable echo times (TE: 22, 44, 66, 88, 110, 132, 154, 176, 198, 220, 242, 264, 286, 308, 330, and 352 ms). The remaining spatial resolution parameters were as follows: acquisition matrix of 256 × 256, voxel size (1.4 × 1.1 × 5.0 mm), field of view (270 mm), slice thickness (5 mm), flip angle (180 deg), and averages (1).

**Suppl. Fig. S3B.** Effects of carbon-encapsulated iron nanoparticles on R2 (1/T2) measured at the magnetic field of 1.5 Tesla. Please see Suppl. Fig. S3A for the acquisition parameters.

**Suppl. Fig. S4A.** Hydrodynamic sizes of raw carbon-encapsulated iron nanoparticles in the gelatin B phantom models.

**Suppl. Fig. S4B.** Hydrodynamic sizes of purified carbon-encapsulated iron nanoparticles
in the gelatin B phantom models.

**Suppl. Fig. S4C.** Hydrodynamic sizes of surface-functionalized carbon-encapsulated iron nanoparticles in the gelatin B phantom models.

**Suppl. Fig. S4D.** Hydrodynamic sizes of gelatin B phantom and water (control).
